# Supplementary material for: Impact of Intraoperative Fluid Balance and Norepinephrine on Postoperative Acute Kidney Injury after Cystectomy and Urinary Diversion over Two Decades: A Retrospective Observational Cohort Study
Source: MDPI journal article supplement (doi:10.3390/jcm12134554), 2023-07-07
Supplement: s1 [file s1]

# **Supplementary Material: Impact of Intraoperative Fluid Balance and Norepinephrine on Postoperative Acute Kidney Injury after Cystectomy and Urinary Diversion over Two Decades: A Retrospective Observational Cohort Study**

Markus Huber, Marc A. Furrer, François Jardot, Dominique Engel, Christian M. Beilstein, Fiona C. Burkhard, Patrick Y. Wuethrich

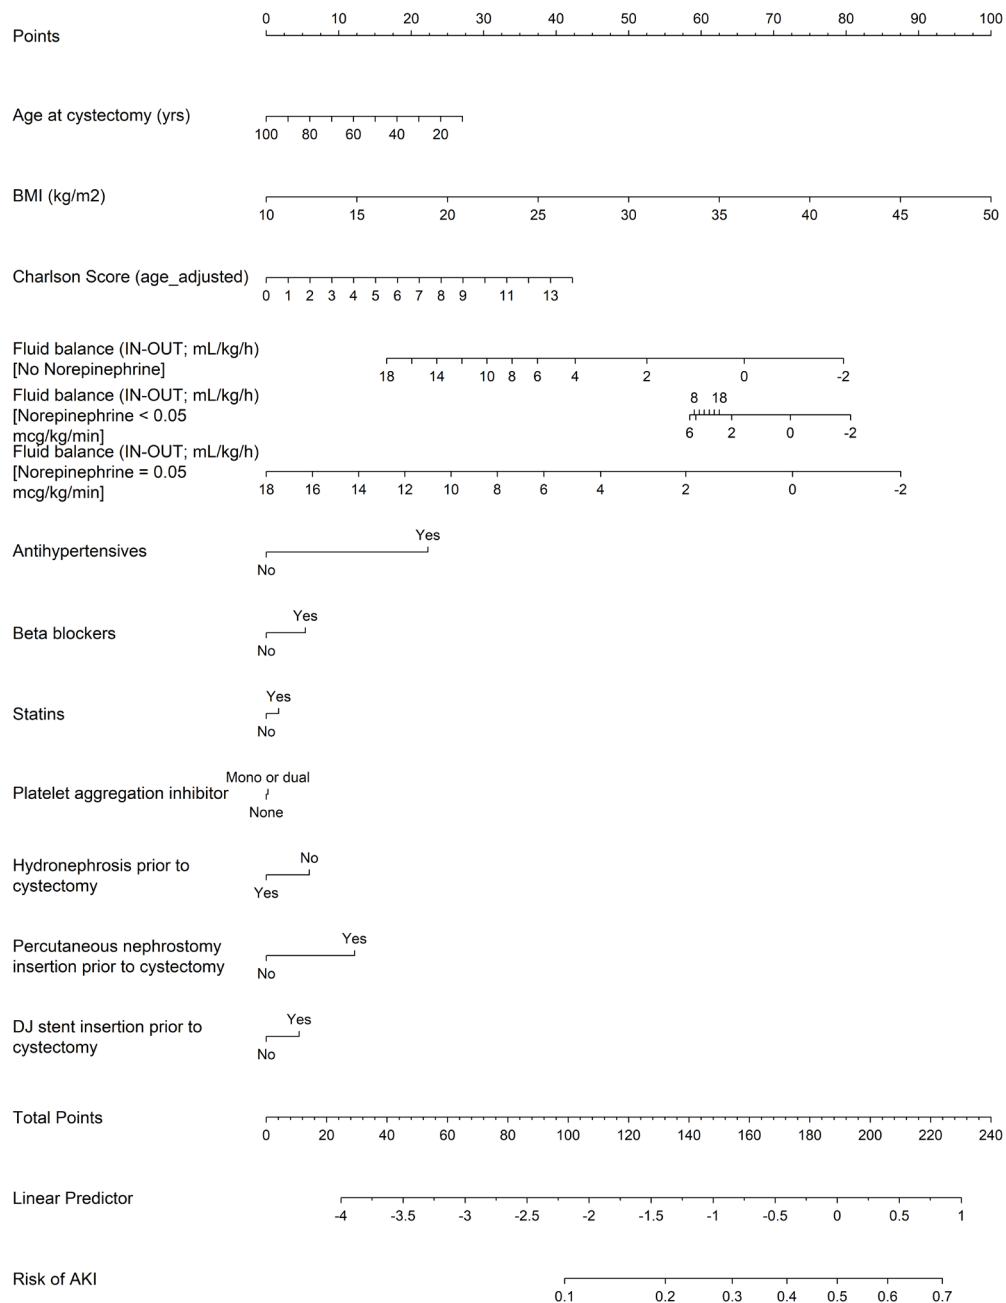

**Figure S1.** Nomogram for predicting risk of acute kidney injury. Note that norepinephrine was categorized in 3 levels in order to account for the zero-inflated nature of norepinephrine administration.

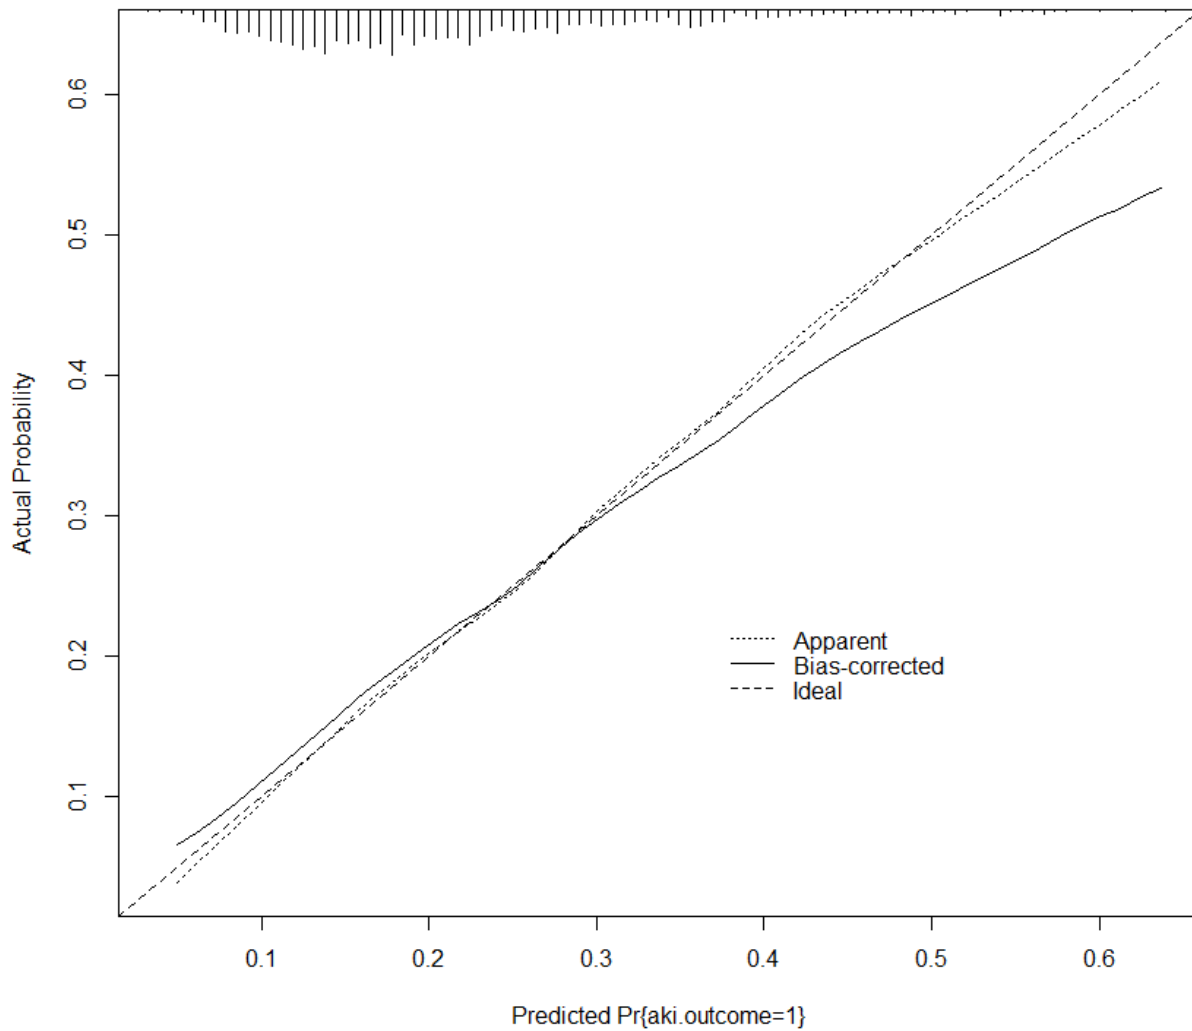

**Figure S1.** Calibration plot of the multivariable logistic regression model with AKI as binary outcome.

**Table S1.** Laboratory measurements of creatinine and glomerular filtration rate.

|                                 | All Patients      | Without AKI       | With AKI          | <i>p</i> |
|---------------------------------|-------------------|-------------------|-------------------|----------|
|                                 | N = 1483          | N = 1162          | N = 321           |          |
| Laboratory measurements         |                   |                   |                   |          |
| Creatinine (μmol/L)             |                   |                   |                   |          |
| Preoperative [ <i>n</i> = 1482] | 86.0 [71.0;108.0] | 85.0 [70.0;106.0] | 92.0 [75.0;111.0] | 0.01     |
| 1 month [ <i>n</i> = 11,018]    | 86.0 [70.0;110.0] | 83.2 [69.0;104.0] | 96.5 [78.0;122.0] | <0.001   |
| 3 month [ <i>n</i> = 1273]      | 85.0 [71.0;105.0] | 83.0 [69.0;101.0] | 95.0 [76.0;117.0] | <0.001   |
| 6 month [ <i>n</i> = 1127]      | 89.0 [74.0;108.0] | 87.0 [72.0;104.0] | 96.0 [81.5;120.0] | <0.001   |
| 12 month [ <i>n</i> = 972]      | 89.0 [74.0;109.0] | 87.0 [73.0;104.0] | 99.0 [80.2;128.0] | <0.001   |
| 12 month [ <i>n</i> = 800]      | 91.0 [75.0;110.0] | 89.0 [74.0;106.0] | 98.0 [82.0;124.0] | <0.001   |
| 24 month [ <i>n</i> = 715]      | 89.0 [76.0;112.0] | 88.0 [74.0;107.0] | 100 [81.0;123.0]  | <0.001   |
| 36 month [ <i>n</i> = 613]      | 88.0 [75.0;110.0] | 87.0 [74.0;106.0] | 100 [82.8;121.0]  | <0.001   |

|                                  | All Patients      | Without AKI       | With AKI         | <i>p</i> |
|----------------------------------|-------------------|-------------------|------------------|----------|
|                                  | N = 1483          | N = 1162          | N = 321          |          |
| 48 month [ <i>n</i> = 524]       | 89.0 [76.0;108.0] | 87.0 [75.0;105.0] | 102 [83.0;130.0] | <0.001   |
| 60 month [ <i>n</i> = 427]       | 89.0 [78.0;108.0] | 88.0 [76.0;105.0] | 100 [83.5;121.0] | 0.002    |
| 72 month [ <i>n</i> = 351]       | 90.0 [76.5;112.0] | 88.0 [76.0;109.0] | 104 [88.2;122.0] | 0.002    |
| GFR (mL/min)                     |                   |                   |                  |          |
| Preoperative [ <i>n</i> = 1,482] | 73.1 [55.3;93.1]  | 73.9 [55.9;94.0]  | 70.2 [52.5;90.0] | 0.13     |
| 1 month [ <i>n</i> = 1,1018]     | 85.6 [62.8;117]   | 88.0 [65.9;119]   | 77.5 [54.9;106]  | <0.001   |
| 3 months [ <i>n</i> = 1,273]     | 83.9 [63.3;108]   | 85.2 [65.1;111]   | 78.9 [56.6;103]  | 0.002    |
| 6 months [ <i>n</i> = 1,127]     | 76.5 [57.7;98.5]  | 77.5 [59.6;99.4]  | 71.5 [52.9;95.0] | 0.004    |
| 12 months [ <i>n</i> = 972]      | 71.6 [54.5;89.1]  | 73.0 [56.4;91.0]  | 62.5 [46.4;82.9] | <0.001   |
| 12 months [ <i>n</i> = 800]      | 71.9 [54.1;89.5]  | 73.0 [57.6;91.2]  | 63.0 [48.5;83.1] | 0.001    |
| 24 months [ <i>n</i> = 715]      | 71.8 [54.7;89.0]  | 73.2 [55.3;89.9]  | 64.2 [49.1;84.9] | 0.015    |
| 36 months [ <i>n</i> = 613]      | 74.0 [55.1;88.0]  | 75.4 [58.7;88.4]  | 64.6 [50.7;84.6] | 0.020    |
| 48 months [ <i>n</i> = 524]      | 72.6 [55.8;89.0]  | 74.3 [57.4;89.2]  | 63.8 [46.4;87.8] | 0.012    |
| 60 months [ <i>n</i> = 427]      | 72.5 [55.2;88.5]  | 73.9 [57.1;88.4]  | 62.8 [49.4;89.9] | 0.12     |
| 72 months [ <i>n</i> = 351]      | 73.0 [55.0;87.6]  | 73.7 [55.8;88.0]  | 66.8 [49.6;86.4] | 0.11     |

**Table S2.** Coefficient of the multivariable logistic regression model on which the nomogram in the manuscript is based on (Figure 5).

| Predictor                                                                                                                            | Log-odds | Standard Error | Wald Z | <i>p</i> |
|--------------------------------------------------------------------------------------------------------------------------------------|----------|----------------|--------|----------|
| Intercept                                                                                                                            | -2.7294  | 0.7476         | -3.65  | 0.0003   |
| Age (years)                                                                                                                          | -0.0073  | 0.0069         | -1.07  | 0.2866   |
| BMI (kg/m <sup>2</sup> )                                                                                                             | 0.0609   | 0.0140         | 4.35   | <0.0001  |
| Antihypertensives (Yes)                                                                                                              | 0.5432   | 0.1490         | 3.65   | 0.0003   |
| Beta-blockers (Yes)                                                                                                                  | 0.1316   | 0.1641         | 0.80   | 0.4226   |
| Statins (Yes)                                                                                                                        | 0.0417   | 0.1662         | 0.25   | 0.8019   |
| Platelet aggregation inhibitors (Yes)                                                                                                | 0.0056   | 0.1938         | 0.03   | 0.9769   |
| Hydronephrosis (Yes)                                                                                                                 | -0.1443  | 0.1901         | -0.76  | 0.4481   |
| Nephrostomy (Yes)                                                                                                                    | 0.2966   | 0.2570         | 1.15   | 0.2484   |
| DJ Stent (Yes)                                                                                                                       | 0.1102   | 0.2599         | 0.42   | 0.6716   |
| Charlson Score (age adjusted)                                                                                                        | 0.0734   | 0.0293         | 2.51   | 0.0122   |
| Norepinephrine ( $\geq 0.05 \mu\text{g kg}^{-1} \text{min}^{-1}$ vs none)                                                            | 0.1547   | 0.5702         | 0.27   | 0.7861   |
| Norepinephrine ( $< 0.05 \mu\text{g kg}^{-1} \text{min}^{-1}$ vs none)                                                               | 0.1622   | 0.5364         | 0.30   | 0.7624   |
| Fluid balance (first difference in cubic splines)                                                                                    | -0.1664  | 0.1817         | -0.92  | 0.3598   |
| Fluid balance (second difference in cubic splines)                                                                                   | 0.1228   | 0.2288         | 0.54   | 0.5914   |
| Norepinephrine ( $\geq 0.05 \mu\text{g kg}^{-1} \text{min}^{-1}$ vs none) $\times$ Fluid balance (first difference in cubic splines) | 0.0654   | 0.2239         | 0.29   | 0.7701   |
| Norepinephrine ( $< 0.05 \mu\text{g kg}^{-1} \text{min}^{-1}$ vs none) $\times$ Fluid balance (first difference in cubic splines)    | -0.0152  | 0.2082         | -0.07  | 0.9417   |

|                                                                                                                                       |         |        |       |        |
|---------------------------------------------------------------------------------------------------------------------------------------|---------|--------|-------|--------|
| Norepinephrine ( $\geq 0.05 \mu\text{g kg}^{-1} \text{min}^{-1}$ vs none) $\times$ Fluid balance (second difference in cubic splines) | -0.0148 | 0.3125 | -0.05 | 0.9623 |
| Norepinephrine ( $< 0.05 \mu\text{g kg}^{-1} \text{min}^{-1}$ vs none) $\times$ Fluid balance (second difference in cubic splines)    | -0.0200 | 0.2874 | -0.07 | 0.9445 |

**Table S3.** Coefficient of the multivariable logistic regression model without vasopressor and fluid-balance interaction and without a spline representation of the total fluid balance. Binary outcome is AKI.

| Characteristic                                               | OR <sup>1</sup> | 95% CI <sup>1</sup> | <i>p</i> |
|--------------------------------------------------------------|-----------------|---------------------|----------|
| Age at cystectomy (years)                                    | 0.99            | 0.98, 1.01          | 0.2      |
| BMI ( $\text{kg/m}^2$ )                                      | 1.06            | 1.03, 1.09          | <0.001   |
| Antihypertensives (Yes)                                      | 1.73            | 1.29, 2.31          | <0.001   |
| No                                                           | —               | —                   |          |
| Beta-blockers (Yes)                                          | 1.14            | 0.82, 1.56          | 0.4      |
| Statins (Yes)                                                | 1.04            | 0.75, 1.44          | 0.8      |
| Platelet aggregation inhibitors                              |                 |                     |          |
| None                                                         | —               | —                   |          |
| Mono or dual                                                 | 1.01            | 0.69, 1.47          | >0.9     |
| Hydronephrosis prior to cystectomy (Yes)                     | 0.87            | 0.59, 1.25          | 0.5      |
| Percutaneous nephrostomy insertion prior to cystectomy (Yes) | 1.33            | 0.80, 2.19          | 0.3      |
| DJ stent insertion prior to cystectomy (Yes)                 | 1.12            | 0.66, 1.84          | 0.7      |
| Charlson Score (age_adjusted)                                | 1.08            | 1.02, 1.14          | 0.011    |
| Norepinephrine                                               |                 |                     |          |
| 0 $\mu\text{g kg}^{-1} \text{min}^{-1}$                      | —               | —                   |          |
| larger equal 0.05 $\mu\text{g kg}^{-1} \text{min}^{-1}$      | 1.38            | 0.93, 2.05          | 0.11     |
| smaller 0.05 $\mu\text{g kg}^{-1} \text{min}^{-1}$           | 1.14            | 0.80, 1.64          | 0.5      |
| Intraoperative fluid balance (IN – OUT; mL/kg/h)             | 0.92            | 0.86, 0.97          | 0.005    |

<sup>1</sup>OR = Odds Ratio, CI = Confidence Interval

**Table S4.** STROBE Statement—Checklist of items that should be included in reports of cohort studies.

| Item No                | Recommendation                                                                                                                  | Page No |
|------------------------|---------------------------------------------------------------------------------------------------------------------------------|---------|
| Title and abstract 1   | (a) Indicate the study's design with a commonly used term in the title or the abstract                                          | 1       |
|                        | (b) Provide in the abstract an informative and balanced summary of what was done and what was found                             | 1       |
| Introduction           |                                                                                                                                 |         |
| Background/rationale 2 | Explain the scientific background and rationale for the investigation being reported                                            | 2       |
| Objectives 3           | State specific objectives, including any prespecified hypotheses                                                                | 2       |
| Methods                |                                                                                                                                 |         |
| Study design 4         | Present key elements of study design early in the paper                                                                         | 2       |
| Setting 5              | Describe the setting, locations, and relevant dates, including periods of recruitment, exposure, follow-up, and data collection | 2       |
| Participants 6         | (a) Give the eligibility criteria, and the sources and methods of selection of participants. Describe methods of follow-up      | 2       |

|                              |      |                                                                                                                                                                                                                |           |
|------------------------------|------|----------------------------------------------------------------------------------------------------------------------------------------------------------------------------------------------------------------|-----------|
|                              |      | (b) For matched studies, give matching criteria and number of exposed and unexposed                                                                                                                            | na        |
| Variables                    | 7    | Clearly define all outcomes, exposures, predictors, potential confounders, and effect modifiers. Give diagnostic criteria, if applicable                                                                       | 3         |
| Data sources/<br>measurement | 8 *  | For each variable of interest, give sources of data and details of methods of assessment (measurement). Describe comparability of assessment methods if there is more than one group                           | 3         |
| Bias                         | 9    | Describe any efforts to address potential sources of bias                                                                                                                                                      | 3–4       |
| Study size                   | 10   | Explain how the study size was arrived at                                                                                                                                                                      | 4         |
| Quantitative variables       | 11   | Explain how quantitative variables were handled in the analyses. If applicable, describe which groupings were chosen and why                                                                                   | 4         |
| Statistical methods          | 12   | (a) Describe all statistical methods, including those used to control for confounding                                                                                                                          | 3–4       |
|                              |      | (b) Describe any methods used to examine subgroups and interactions                                                                                                                                            | 4         |
|                              |      | (c) Explain how missing data were addressed                                                                                                                                                                    | 4         |
|                              |      | (d) If applicable, explain how loss to follow-up was addressed                                                                                                                                                 | na        |
|                              |      | (e) Describe any sensitivity analyses                                                                                                                                                                          | 4         |
| Results                      |      |                                                                                                                                                                                                                |           |
| Participants                 | 13 * | (a) Report numbers of individuals at each stage of study—e.g. numbers potentially eligible, examined for eligibility, confirmed eligible, included in the study, completing follow-up, and analysed            | 4         |
|                              |      | (b) Give reasons for non-participation at each stage                                                                                                                                                           | 4         |
|                              |      | (c) Consider use of a flow diagram                                                                                                                                                                             | na        |
| Descriptive data             | 14 * | (a) Give characteristics of study participants (e.g. demographic, clinical, social) and information on exposures and potential confounders                                                                     | 5 Table 1 |
|                              |      | (b) Indicate number of participants with missing data for each variable of interest                                                                                                                            | 4–5       |
|                              |      | (c) Summarize follow-up time (e.g., average and total amount)                                                                                                                                                  | 4–5       |
| Outcome data                 | 15 * | Report numbers of outcome events or summary measures over time                                                                                                                                                 | 5–7       |
| Main results                 | 16   | (a) Give unadjusted estimates and, if applicable, confounder-adjusted estimates and their precision (e.g., 95% confidence interval). Make clear which confounders were adjusted for and why they were included | 6–9       |
|                              |      | (b) Report category boundaries when continuous variables were categorized                                                                                                                                      | 8–9       |
|                              |      | (c) If relevant, consider translating estimates of relative risk into absolute risk for a meaningful time period                                                                                               | 8–9       |
| Other analyses               | 17   | Report other analyses done—e.g. analyses of subgroups and interactions, and sensitivity analyses                                                                                                               | 9         |
| Discussion                   |      |                                                                                                                                                                                                                |           |
| Key results                  | 18   | Summarize key results with reference to study objectives                                                                                                                                                       | 10        |
| Limitations                  | 19   | Discuss limitations of the study, taking into account sources of potential bias or imprecision. Discuss both direction and magnitude of any potential bias                                                     | 11–12     |
| Interpretation               | 20   | Give a cautious overall interpretation of results considering objectives, limitations, multiplicity of analyses, results from similar studies, and other relevant evidence                                     | 11–12     |
| Generalizability             | 21   | Discuss the generalizability (external validity) of the study results                                                                                                                                          | 12        |
| Other information            |      |                                                                                                                                                                                                                |           |
| Funding                      | 22   | Give the source of funding and the role of the funders for the present study and, if applicable, for the original study on which the present article is based                                                  | 13        |

\* Give information separately for exposed and unexposed groups.
